# Supplementary material
Source: HighWire-hosted journal article supplement (https://erj.ersjournals.com/content/51/1/1701385)
Supplement: inline-supplementary-material-1 [file inline-supplementary-material-1.pdf]

## Supplementary Information

**Table S1: Demographics of participants enrolled in the study.**

| <b>Subject</b> | <b>Gender</b> | <b>Age</b> | <b>FEV<sub>1</sub> %<br/>predicted</b> | <b>Baseline<br/>PC<sub>20</sub><br/>(mg/mL)</b> |
|----------------|---------------|------------|----------------------------------------|-------------------------------------------------|
| 1              | F             | 22         | 107                                    | 3.5                                             |
| 2              | F             | 31         | 113                                    | >16                                             |
| 3              | F             | 24         | 116                                    | >16                                             |
| 4              | M             | 32         | 123                                    | >16                                             |
| 5              | F             | 34         | 79                                     | 0.2                                             |
| 6              | M             | 46         | 66                                     | 0.3                                             |
| 7              | M             | 27         | 105                                    | >16                                             |
| 8              | F             | 46         | 63                                     | >16                                             |
| 9              | F             | 20         | 98                                     | 2.1                                             |
| 10             | F             | 31         | 103                                    | 0.3                                             |
| 11             | M             | 28         | 100                                    | >16                                             |
| 12             | M             | 23         | 104                                    | 2.4                                             |
| 13             | F             | 23         | 101                                    | >16                                             |
| 14             | M             | 23         | 112                                    | >16                                             |

**Table S2: Expression levels of 79 proteins altered by DEA co-exposure compared to FAA.**

| Protein        | SWPRO<br>T | Log2 Fold Change with respect to FAS |       |      |           | Description                                                                       | Z-Score |
|----------------|------------|--------------------------------------|-------|------|-----------|-----------------------------------------------------------------------------------|---------|
|                |            | DES                                  | FAA   | DEA  | (DEA-FAA) |                                                                                   |         |
| <b>C4B</b>     | P0C0L5     | 5.48                                 | 0.35  | 4.92 | 4.57      | Complement C4-B                                                                   | 3.97    |
| <b>LCN1</b>    | P31025     | -0.57                                | 0.95  | 5.28 | 4.33      | Lipocalin-1                                                                       | 3.79    |
| <b>CST2</b>    | P09228     | 0.00                                 | 3.67  | 7.80 | 4.13      | Cystatin-SA                                                                       | 3.75    |
| <b>MUC16</b>   | Q8WXI7     | 1.96                                 | -1.08 | 3.20 | 4.28      | Mucin-16                                                                          | 3.65    |
| <b>TCN1</b>    | P20061     | 1.99                                 | -0.33 | 3.89 | 4.22      | Transcobalamin-1                                                                  | 3.64    |
| <b>TUBB4B</b>  | P68371     | -2.67                                | -3.59 | 0.15 | 3.74      | Tubulin beta-4B chain                                                             | 3.06    |
| <b>PRR4</b>    | Q16378     | -1.20                                | -0.81 | 2.60 | 3.41      | Proline-rich protein 4                                                            | 2.91    |
| <b>CST1</b>    | P01037     | 0.00                                 | 2.53  | 5.75 | 3.22      | Cystatin-SN                                                                       | 2.91    |
| <b>LEG1</b>    | Q6P5S2     | 0.32                                 | -0.83 | 2.46 | 3.29      | Protein LEG1 homolog                                                              | 2.81    |
| <b>ADH7</b>    | P40394     | -0.82                                | -0.65 | 2.40 | 3.05      | Alcohol dehydrogenase class 4 mu/sigma chain                                      | 2.61    |
| <b>SCGB3A1</b> | Q96QR1     | -1.26                                | -0.87 | 2.04 | 2.91      | Secretoglobulin family 3A member 1                                                | 2.48    |
| <b>CLIC6</b>   | Q96NY7     | 0.70                                 | -2.46 | 0.50 | 2.96      | Chloride intracellular channel protein 6                                          | 2.44    |
| <b>UBE2V1</b>  | Q13404     | 0.00                                 | 0.83  | 3.50 | 2.67      | Ubiquitin-conjugating enzyme E2 variant 1                                         | 2.35    |
| <b>MUC4</b>    | Q99102     | 0.00                                 | -0.68 | 2.00 | 2.68      | Mucin-4                                                                           | 2.29    |
| <b>PPP2R1A</b> | P30153     | -0.89                                | -2.39 | 0.33 | 2.72      | Serine/threonine-protein phosphatase 2A 65 kDa regulatory subunit A alpha isoform | 2.23    |
| <b>ZG16B</b>   | Q96DA0     | 0.00                                 | -0.92 | 1.71 | 2.63      | Zymogen granule protein 16 homolog B                                              | 2.23    |
| <b>TXNL1</b>   | O43396     | -0.64                                | -2.24 | 0.45 | 2.69      | Thioredoxin-like protein 1                                                        | 2.22    |
| <b>ALDH3A1</b> | P30838     | 0.13                                 | 0.27  | 2.81 | 2.53      | Aldehyde dehydrogenase, dimeric NADP-preferring                                   | 2.21    |
| <b>MVP</b>     | Q14764     | 0.70                                 | -2.46 | 0.18 | 2.64      | Major vault protein                                                               | 2.17    |
| <b>FCGBP</b>   | Q9Y6R7     | -0.50                                | -1.43 | 1.14 | 2.57      | IgGFC-binding protein                                                             | 2.16    |
| <b>CKB</b>     | P12277     | -0.34                                | -2.11 | 0.48 | 2.59      | Creatine kinase B-type                                                            | 2.14    |
| <b>SFN</b>     | P31947     | -0.85                                | -1.43 | 1.05 | 2.48      | 14-3-3 protein sigma                                                              | 2.08    |
| <b>PLIN3</b>   | O60664     | -2.63                                | -2.46 | 0.03 | 2.49      | Perilipin-3                                                                       | 2.04    |
| <b>CHMP4B</b>  | Q9H444     | -0.83                                | -2.08 | 0.38 | 2.46      | Charged multivesicular body protein 4b                                            | 2.03    |
| <b>SPTAN1</b>  | Q13813     | -0.34                                | 0.11  | 2.43 | 2.32      | Spectrin alpha chain, non-erythrocytic 1                                          | 2.01    |
| <b>GNPDA1</b>  | P46926     | -0.28                                | -2.00 | 0.42 | 2.42      | Glucosamine-6-phosphate isomerase 1                                               | 2.00    |
| <b>DARS</b>    | P14868     | 0.67                                 | -1.34 | 1.02 | 2.36      | Aspartate--tRNA ligase, cytoplasmic                                               | 1.97    |

|          |        |       |       |       |       |                                                    |       |
|----------|--------|-------|-------|-------|-------|----------------------------------------------------|-------|
| CCT2     | P78371 | -1.97 | -1.57 | 0.78  | 2.35  | T-complex protein 1 subunit beta                   | 1.96  |
| ABHD14B  | Q96IU4 | -1.50 | -2.31 | 0.08  | 2.38  | Alpha/beta hydrolase domain-containing protein 14B | 1.95  |
| CD2AP    | Q9Y5K6 | -1.46 | -1.54 | 0.77  | 2.31  | CD2-associated protein                             | 1.92  |
| SSB      | P05455 | 1.10  | -1.49 | 0.80  | 2.29  | Lupus La protein                                   | 1.91  |
| TFF3     | Q07654 | 0.00  | -0.62 | 1.56  | 2.18  | Trefoil factor 3                                   | 1.86  |
| TF       | Q29443 | 0.00  | 8.19  | 9.84  | 1.65  | Transferrin                                        | 1.83  |
| ALOX15   | P16050 | 0.22  | -0.80 | 1.31  | 2.10  | Arachidonate 15-lipoxygenase                       | 1.78  |
| TCP1     | P17987 | -0.10 | -2.21 | -0.05 | 2.17  | T-complex protein 1 subunit alpha                  | 1.77  |
| NPEPPS   | P55786 | 0.07  | -1.86 | 0.21  | 2.07  | Puromycin-sensitive aminopeptidase                 | 1.70  |
| NUDT5    | Q9UKK9 | -2.39 | -2.72 | -0.60 | 2.12  | ADP-sugar pyrophosphatase                          | 1.70  |
| IGFBP2   | P18065 | -2.39 | -1.11 | 0.89  | 2.00  | Insulin-like growth factor-binding protein 2       | 1.68  |
| MUC5AC   | P98088 | 0.99  | -0.52 | 1.44  | 1.96  | Mucin-5AC                                          | 1.68  |
| PSMB4    | P28070 | -0.60 | -2.27 | -0.23 | 2.05  | Proteasome subunit beta type-4                     | 1.66  |
| AP2B1    | P63010 | 0.00  | 0.64  | 2.52  | 1.88  | AP-2 complex subunit beta                          | 1.66  |
| NUCB2    | P80303 | 0.18  | -0.21 | 1.73  | 1.93  | Nucleobindin-2                                     | 1.66  |
| APRT     | P07741 | -1.97 | -1.43 | -3.27 | -1.84 | Adenine phosphoribosyltransferase                  | -1.66 |
| HIST1H4A | P62805 | 2.69  | 1.99  | -0.06 | -2.05 | Histone H4                                         | -1.68 |
| CTBS     | Q01459 | -0.09 | 1.45  | -0.59 | -2.03 | Di-N-acetylchitobiase                              | -1.69 |
| OSCAR    | Q8IYS5 | -1.81 | 1.19  | -0.83 | -2.02 | Osteoclast-associated immunoglobulin-like receptor | -1.69 |
| LACRT    | Q9GZZ8 | 0.00  | 2.58  | 0.45  | -2.13 | Extracellular glycoprotein lacritin                | -1.71 |
| DYNC1H1  | Q14204 | 1.26  | 1.69  | -0.41 | -2.09 | Cytoplasmic dynein 1 heavy chain 1                 | -1.73 |
| CDC42    | P60953 | 0.92  | 0.67  | -1.43 | -2.09 | Cell division control protein 42 homolog           | -1.78 |
| BCHE     | P06276 | 1.37  | 3.82  | 1.53  | -2.29 | Cholinesterase                                     | -1.79 |
| FMNL1    | O95466 | -0.57 | 1.75  | -0.44 | -2.18 | Formin-like protein 1                              | -1.81 |
| C1QA     | P02745 | 0.48  | 1.62  | -0.57 | -2.19 | Complement C1q subcomponent subunit A              | -1.82 |
| KRT16    | P08779 | -2.73 | 1.02  | -1.14 | -2.16 | Keratin, type I cytoskeletal 16                    | -1.82 |
| RAB5C    | P51148 | 0.18  | 0.46  | -1.67 | -2.13 | Ras-related protein Rab-5C                         | -1.82 |
| CD93     | Q9NPY3 | 0.23  | 1.38  | -0.81 | -2.19 | Complement component C1q receptor                  | -1.83 |

|          |        |        |       |       |       |                                                 |       |
|----------|--------|--------|-------|-------|-------|-------------------------------------------------|-------|
| S100A16  | Q96FQ6 | 0.00   | 2.05  | -0.20 | -2.25 | Protein S100-A16                                | -1.84 |
| CES1     | P23141 | 1.40   | -1.22 | -3.35 | -2.12 | Liver carboxylesterase 1                        | -1.90 |
| DSG1     | Q02413 | -0.32  | -0.05 | -2.24 | -2.19 | Desmoglein-1                                    | -1.90 |
| HIST1H1E | P10412 | 0.57   | 0.00  | -2.21 | -2.21 | Histone H1.4                                    | -1.91 |
| KRT14    | P02533 | 0.42   | 0.40  | -1.85 | -2.24 | Keratin, type I cytoskeletal 14                 | -1.92 |
| FTL      | P02792 | -1.05  | 0.30  | -1.97 | -2.27 | Ferritin light chain                            | -1.95 |
| COPG1    | Q9Y678 | -1.07  | 1.72  | -0.65 | -2.36 | Coatomer subunit gamma-1                        | -1.96 |
| KV119    | P01611 | -1.81  | 1.29  | -1.13 | -2.41 | Ig kappa chain V-I region Wes                   | -2.03 |
| TUBB     | P07437 | 2.60   | 2.10  | -0.39 | -2.49 | Tubulin beta chain                              | -2.05 |
| MAPK1    | P28482 | 0.95   | -0.87 | -3.23 | -2.35 | Mitogen-activated protein kinase 1              | -2.08 |
| HNRNPU   | Q00839 | 1.39   | 2.86  | 0.27  | -2.59 | Heterogeneous nuclear ribonucleoprotein U       | -2.10 |
| GALNT5   | Q7Z7M9 | 0.74   | 0.67  | -1.85 | -2.51 | Polypeptide N-acetylgalactosaminyltransferase 5 | -2.14 |
| KRT19    | P08727 | 0.00   | 4.64  | 1.83  | -2.81 | Keratin, type I cytoskeletal 19                 | -2.21 |
| KV301    | P01619 | -0.22  | 2.37  | -0.35 | -2.71 | Ig kappa chain V-III region B6                  | -2.23 |
| KRT17    | Q04695 | -2.31  | 0.32  | -2.36 | -2.67 | Keratin, type I cytoskeletal 17                 | -2.30 |
| HV305    | P01766 | 0.60   | 3.24  | 0.29  | -2.96 | Ig heavy chain V-III region BRO                 | -2.40 |
| APOL1    | O14791 | 0.00   | 4.26  | 1.23  | -3.03 | Apolipoprotein L1                               | -2.42 |
| POTEE    | Q6S8J3 | 0.15   | -0.43 | -3.50 | -3.07 | POTE ankyrin domain family member E             | -2.68 |
| SERPINA5 | P05154 | 0.96   | 2.31  | -1.19 | -3.49 | Plasma serine protease inhibitor                | -2.91 |
| DSP      | P15924 | -2.28  | 0.24  | -3.35 | -3.58 | Desmoplakin                                     | -3.09 |
| KRT6A    | P02538 | -2.19  | 1.16  | -2.51 | -3.67 | Keratin, type II cytoskeletal 6A                | -3.12 |
| GBE1     | Q04446 | 4.06   | 4.29  | -0.09 | -4.38 | 1,4-alpha-glucan-branching enzyme               | -3.58 |
| KV118    | P01610 | -21.99 | 1.94  | -3.41 | -5.34 | Ig kappa chain V-I region WEA                   | -4.53 |
| C4A      | P0C0L4 | -3.56  | 0.95  | -4.68 | -5.63 | Complement C4-A                                 | -4.83 |

**Proteins in bold were selected for further validation studies**

**Table S3: Relative band intensity in western blots determined by densitometry for individual BAL samples from independent participants**

| Participant* | LCN1 Densitometry                                       |      |     | TCN1 Densitometry                                       |     |     |
|--------------|---------------------------------------------------------|------|-----|---------------------------------------------------------|-----|-----|
|              | Relative band intensity compared to FAS normalized to 1 |      |     | Relative band intensity compared to FAS normalized to 1 |     |     |
|              | DES                                                     | FAA  | DEA | DES                                                     | FAA | DEA |
| 1            | ND                                                      | 1.2  | 0.9 | ND                                                      | 1.7 | 0.9 |
| 3            | 7                                                       | 4.5  | 5.4 | 5.3                                                     | 3   | 2.9 |
| 4            | 1.6                                                     | 2.1  | 1.6 | 0.9                                                     | 2   | 2.5 |
| 7            | 0.9                                                     | 6.7  | 5.6 | 1.1                                                     | 4.7 | 6.8 |
| 10           | 4                                                       | 1.5  | 9.7 | 1.6                                                     | ND  | 28  |
| 12           | 0.3                                                     | 11.8 | 2   | 0.6                                                     | 2.4 | 0.9 |
| 13           | 0.7                                                     | 7.7  | 44  | 0.5                                                     | 3.5 | 4.2 |
| 14           | ND                                                      | ND   | 0.7 | 11                                                      | 27  | 22  |

\*Subject numbers corresponds to supplementary table I, detailing demographics of participants enrolled in the study. ND=not detected
